# Supplementary material
Source: PubMed Central journal article supplement (PMC8085887)
Supplement: NIHMS1693190-supplement-SI.pdf [file NIHMS1693190-supplement-SI.pdf]

## SUPPORTING INFORMATION for

### Site-Specific Antibody Conjugation Strategy to Functionalize Virus-based Nanoparticles

Jooneon Park<sup>1#</sup>, Paul L. Chariou<sup>2#</sup>, and Nicole F. Steinmetz<sup>1,2,3,4,5\*</sup>

<sup>1</sup>Department of NanoEngineering, <sup>2</sup>Department of Bioengineering, <sup>3</sup>Department of Radiology

<sup>4</sup>Moore's Cancer Center, <sup>5</sup>Center for Nano-ImmunoEngineering, University of California San

Diego, 9500 Gilman Dr. - MC 0448, La Jolla CA 92039, USA.

\*Corresponding author: [nsteinmetz@ucsd.edu](mailto:nsteinmetz@ucsd.edu)

# these authors contributed equally.

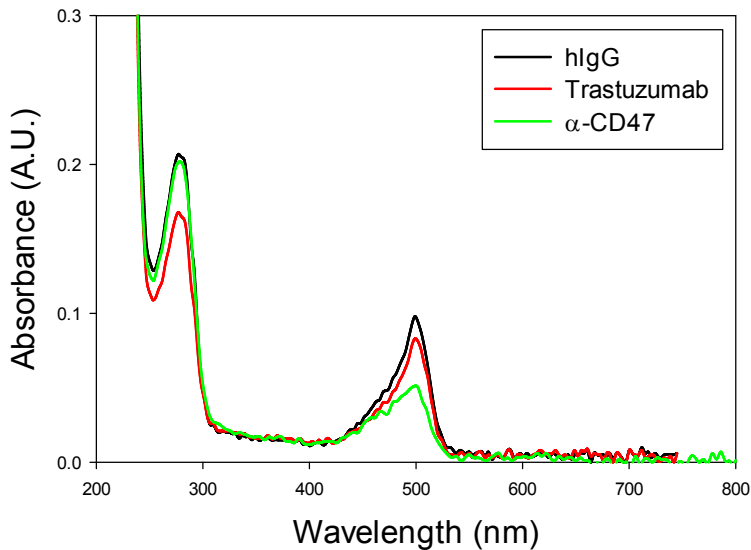

**Figure S1.** UV-spectra of FITC-conjugated antibodies. Using the molecular extinction coefficients for IgG and FITC ( $210,000$  and  $73,000 \text{ M}^{-1}\text{cm}^{-1}$ , respectively), the number of FITC attached to each antibody were determined to be 0.98, 1.05, and 0.66 for hIgG, trastuzumab, and  $\alpha$ -CD47, respectively.

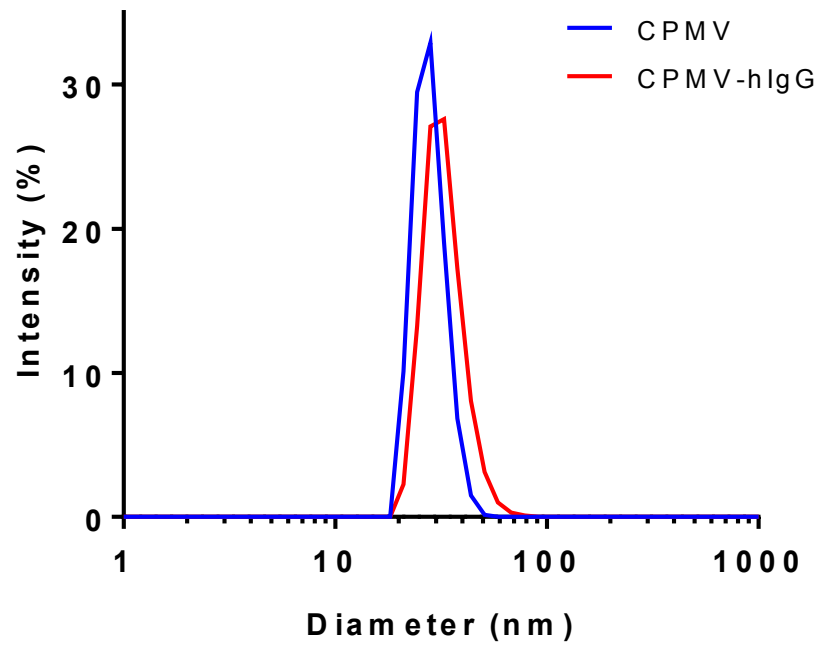

**Figure S2.** Hydrodynamic size change before and after antibody conjugation measured by dynamic light scattering.
